# Supplementary material
Source: ML conference proceedings conference paper supplement (https://openaccess.thecvf.com/content/CVPR2024/html/Wang_RepViT_Revisiting_Mobile_CVPR_2024_paper.html)
Supplement: Supplementary file 1 [file Wang_RepViT_Revisiting_Mobile_CVPR_2024_supplemental.pdf]

# RepViT: Revisiting Mobile CNN From ViT Perspective

Ao Wang<sup>1,2</sup> Hui Chen<sup>1,2\*</sup> Zijia Lin<sup>1</sup> Jungong Han<sup>3</sup> Guiguang Ding<sup>1,2\*</sup>  
<sup>1</sup>Tsinghua University <sup>2</sup>BNRist <sup>3</sup>The University of Sheffield

wa22@mails.tsinghua.edu.cn huichen@mail.tsinghua.edu.cn linzijia07@tsinghua.org.cn  
jungonghan77@gmail.com dinggg@tsinghua.edu.cn

## Appendix

### Table of contents:

- **A:** Architecture and Implementation Details
- **B:** Robustness Evaluation
- **C:** Generalizability to Out-of-Domain Tasks
- **D:** Visualization Results
- **E:** More RepViT-SAM Details and Results

## A. Architecture and Implementation Details

### A.1. Architecture Details

Table 1 provides the architecture details of different RepViT variants.

Table 1. Architecture details of RepViT variants.

| Stage | Resolution                         | Config   | RepViT |      |      |      |      |
|-------|------------------------------------|----------|--------|------|------|------|------|
|       |                                    |          | M0.9   | M1.0 | M1.1 | M1.5 | M2.3 |
| stem  | $\frac{H}{2} \times \frac{W}{2}$   | channels | 24     | 28   | 32   | 32   | 40   |
|       | $\frac{H}{4} \times \frac{W}{4}$   | channels | 48     | 56   | 64   | 64   | 80   |
| 1     | $\frac{H}{4} \times \frac{W}{4}$   | channels | 48     | 56   | 64   | 64   | 80   |
|       |                                    | blocks   | 2      | 2    | 2    | 4    | 6    |
| 2     | $\frac{H}{8} \times \frac{W}{8}$   | channels | 96     | 112  | 128  | 128  | 160  |
|       |                                    | blocks   | 2      | 2    | 2    | 4    | 6    |
| 3     | $\frac{H}{16} \times \frac{W}{16}$ | channels | 192    | 224  | 256  | 256  | 320  |
|       |                                    | blocks   | 14     | 14   | 12   | 24   | 34   |
| 4     | $\frac{H}{32} \times \frac{W}{32}$ | channels | 384    | 448  | 512  | 512  | 640  |
|       |                                    | blocks   | 2      | 2    | 2    | 4    | 2    |

### A.2. Implementation Details

We follow the same training recipe as [13, 14, 25] on ImageNet-1K [3]. We adopt the AdamW optimizer [20] and the cosine learning rate scheduler. The initial learning rate is set to  $4 \times 10^{-3}$ , and the minimum learning rate is set to  $1 \times 10^{-5}$ . The total batch size is set to 2048, and the

\*Corresponding author.

Table 2. Training hyper-parameters for ImageNet-1K.

| Hyperparameters | Config          |
|-----------------|-----------------|
| optimizer       | AdamW           |
| learning rate   | 0.004           |
| batch size      | 2048            |
| LR schedule     | cosine          |
| warmup epochs   | 5               |
| training epochs | 300 / 450       |
| weight decay    | 0.025           |
| augmentation    | RandAug(9, 0.5) |
| color jitter    | 0.4             |
| gradient clip   | 0.02            |
| random erase    | 0.25            |
| label smooth    | 0.1             |
| mixup           | 0.8             |
| cutmix          | 1.0             |

weight decay is set to  $2.5 \times 10^{-2}$ . For data augmentation, we utilize Mixup [31], auto-augmentation [2], and random erasing [32]. Table 2 provides the detailed training hyper-parameters.

For object detection and instance segmentation tasks, following [13, 14, 23, 24], we adopt AdamW optimizer with an initial learning rate of  $2 \times 10^{-4}$  and train the model for 12 epochs with a standard resolution ( $1333 \times 800$ ). The backbones are initialized with pretrained ImageNet-1k weights.

For semantic segmentation, following [13, 14, 24], we train the models on ADE20K [33] for 40K iterations with a batch size of 32. We adopt AdamW optimizer, and employ a poly learning rate schedule with the power of 0.9. The initial learning rate is set to  $2 \times 10^{-4}$ . We employ the standard resolution ( $512 \times 512$ ) for training and report the single scale testing results on the validation set. The backbones are initialized with pretrained weights on ImageNet-1K.

## B. Robustness Evaluation

We present robustness evaluation results for RepViT models in Table 3. Following [21, 25], we directly test ImageNet-1K trained models on a series of robustness benchmark

Table 3. Results on robustness benchmark datasets.

| Model              | Latency ↓<br>(ms) | Clean       | IN-C (↓)    | IN-A        | IN-R        | IN-SK       |
|--------------------|-------------------|-------------|-------------|-------------|-------------|-------------|
| MobileOne-S1       | 0.9               | 75.9        | 80.4        | 2.7         | 36.7        | 22.6        |
| FastViT-T8         | 0.9               | 76.7        | 68.7        | 7.9         | 37.2        | 25.8        |
| MobileViG-Ti       | 1.0               | 75.7        | 70.9        | 5.8         | 38.9        | 26.1        |
| SwiftFormer-XS     | 1.0               | 75.7        | 77.6        | 5.0         | 34.0        | 22.4        |
| <b>RepViT-M0.9</b> | <b>0.9</b>        | <b>78.7</b> | <b>64.8</b> | <b>10.4</b> | <b>42.7</b> | <b>30.4</b> |
| <b>RepViT-M1.0</b> | <b>1.0</b>        | <b>80.0</b> | <b>61.6</b> | <b>13.7</b> | <b>43.9</b> | <b>30.7</b> |
| MobileOne-S2       | 1.1               | 77.4        | 73.6        | 4.8         | 40.0        | 26.4        |
| MobileOne-S3       | 1.3               | 78.1        | 71.6        | 7.1         | 42.1        | 28.5        |
| FastViT-T12        | 1.4               | 80.3        | 60.6        | <b>15.8</b> | 41.8        | 29.5        |
| MobileViG-S        | 1.2               | 78.2        | 64.7        | 10.9        | 41.9        | 28.9        |
| EfficientFormer-L1 | 1.4               | 79.2        | 64.0        | 11.1        | 41.8        | 29.2        |
| SwiftFormer-S      | 1.2               | 78.5        | 66.3        | 9.1         | 38.7        | 27.8        |
| <b>RepViT-M1.1</b> | <b>1.1</b>        | <b>80.7</b> | <b>59.9</b> | <b>15.5</b> | <b>44.9</b> | <b>31.7</b> |
| PoolFormer-S12     | 1.5               | 77.2        | 67.7        | 6.9         | 37.7        | 25.2        |
| MobileOne-S4       | 1.6               | 79.4        | 68.1        | 10.8        | 41.8        | 29.2        |
| FastViT-S12        | 1.5               | 80.9        | 60.3        | 17.3        | 42.1        | 29.9        |
| FastViT-SA12       | 1.8               | 81.9        | 58.0        | 21.8        | 43.8        | 30.8        |
| MobileViG-M        | 1.6               | 80.6        | 59.1        | 17.1        | 45.7        | 32.5        |
| SwiftFormer-L1     | 1.6               | 80.9        | 58.0        | 16.8        | 44.5        | 31.2        |
| <b>RepViT-M1.5</b> | <b>1.5</b>        | <b>82.3</b> | <b>55.1</b> | <b>22.7</b> | <b>47.2</b> | <b>34.0</b> |
| PoolFormer-S24     | 2.4               | 80.3        | 60.6        | 14.5        | 41.4        | 28.8        |
| PoolFormer-S36     | 3.5               | 81.4        | 58.4        | 18.5        | 42.1        | 30.3        |
| MobileViG-B        | 2.7               | 82.6        | 53.9        | 26.0        | 48.8        | 35.7        |
| EfficientFormer-L3 | 2.7               | 82.4        | 54.6        | 23.9        | 46.0        | 33.6        |
| EfficientFormer-L7 | 6.6               | 83.3        | 52.6        | 29.9        | 47.6        | 34.8        |
| SwiftFormer-L3     | 2.9               | 83.0        | 52.9        | 25.9        | 47.2        | 34.3        |
| <b>RepViT-M2.3</b> | <b>2.3</b>        | <b>83.3</b> | <b>51.6</b> | <b>30.2</b> | <b>50.0</b> | <b>36.6</b> |

datasets, including (1) ImageNet-C [6], which comprises algorithmically generated corruptions applied to the ImageNet test set; (2) ImageNet-A [8], which includes naturally occurring examples that are misclassified by ResNets [4]; (3) ImageNet-R [7], which consists of natural renditions of ImageNet object classes, incorporating diverse textures and local image statistics; (4) ImageNet-Sketch [27], which includes black and white sketches of all ImageNet classes, obtained through google image queries. Similar to [19, 21, 25], we report mean corruption error (mCE) for ImageNet-C. A smaller mCE indicates a higher level of robustness exhibited by the model under corruptions. For other benchmark datasets, top-1 accuracies are presented.

As shown in Table 3, RepViT demonstrates strong robustness to corruptions and promising domain generalization capabilities, outperforming previous state-of-the-art models. For example, compared with EfficientFormer-L3, RepViT-M2.3 obtains 3.0 improvement in terms of mCE on ImageNet-C with a smaller latency. Besides, it significantly outperforms SwiftFormer-L3 by 4.3%, 2.8% and 2.3% top-1 accuracies on ImageNet-A, ImageNet-R and ImageNet-Sketch, respectively. These results well demonstrate the strong robustness behaviors of RepViT models.

Table 4. Aerial semantic segmentation results on iSAID. Backbone latencies are measured with image crops of 512×512 on iPhone 12 by Core ML Tools.

| Model                | Latency ↓    | mIoU         |
|----------------------|--------------|--------------|
| EfficientFormerV2-S0 | 6.3ms        | 58.56        |
| <b>RepViT-M1.0</b>   | <b>4.2ms</b> | <b>64.49</b> |
| EfficientFormerV2-S2 | 12.0ms       | 63.79        |
| <b>RepViT-M1.5</b>   | <b>6.4ms</b> | <b>65.57</b> |
| EfficientFormerV2-L  | 18.2ms       | 66.05        |
| <b>RepViT-M2.3</b>   | <b>9.9ms</b> | <b>67.42</b> |

### C. Generalizability to Out-of-Domain Tasks

In order to demonstrate the generalizability of our RepViT to out-of-domain downstream tasks, we conduct experiments on aerial semantic segmentation using the large-scale iSAID [28] benchmark dataset. The iSAID dataset includes a background class and 15 foreground classes over the aerial objects. Its training, validation and test sets separately consist of 1411, 458, and 937 images. Following [26], we integrate RepViT into the UperNet [29] framework and initialize the backbones with pretrained weights on ImageNet-1K. Following [26], We adopt AdamW optimizer, and the initial learning rate and weight decay are set to  $6 \times 10^{-5}$  and  $1 \times 10^{-2}$ , respectively. All models are trained for 80k iterations with a batch size of 8. We introduce the state-of-the-art EfficientFormerV2 [13] as the baseline. Besides, we conduct all evaluations on a single scale for fair comparisons, following [26].

As shown in Table 4, RepViT shows superior performance with low latencies. For example, RepViT-M1.0 presents a significant performance improvement of 5.93 mIoU over EfficientFormerV2-S0. RepViT-M1.5 outperforms EfficientFormerV2-S2 by a considerable margin of 1.78 mIoU with a nearly 50% latency. These results well demonstrate the strong generalizability of our RepViT.

### D. Visualization Results

#### D.1. Visualization on Downstream Tasks

Figure 1 and Figure 2 presents the visualization results when integrating RepViT into the Mask-RCNN framework [5] for object detection/instance segmentation and into the Semantic FPN framework [11] for semantic segmentation, respectively. It can be observed that our RepViT based models can accurately detect and segment the instance in various images. It can also provide high-quality semantic segmentation masks.

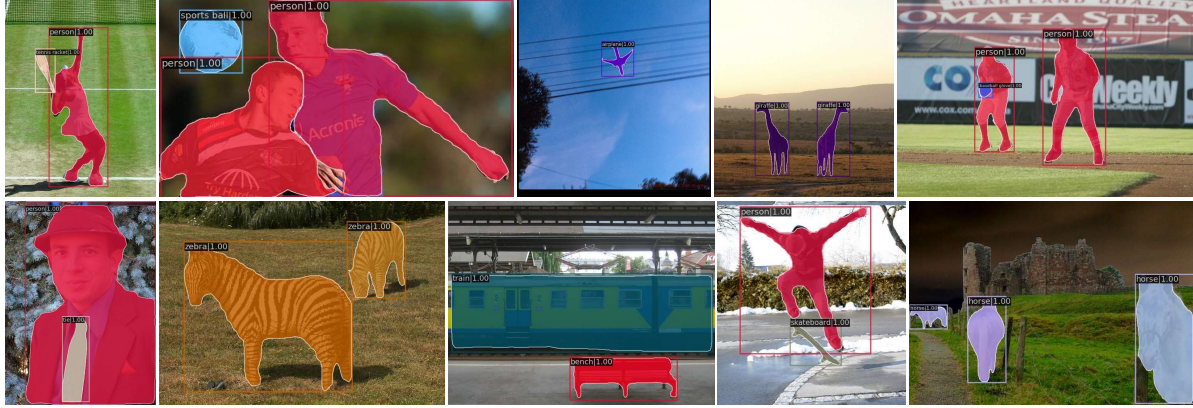

Figure 1. Visualization results for object detection and instance segmentation on COCO [15].

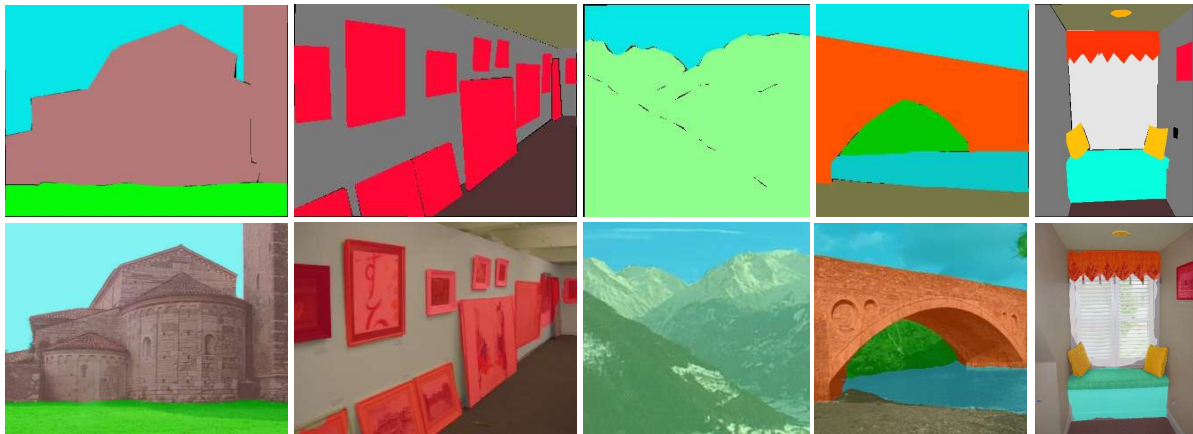

Figure 2. Visualization results for semantic segmentation on ADE20K [33]. The top row presents the ground truth masks and the bottom row shows the mask predictions.

## D.2. Visualization of the Training Process

To better show the benefit of each architectural design incorporated in our RepViT, we conduct visualization for the top-1 accuracy during the training process. As shown in Figure 3, the introduced architectural designs well improve the optimization of the model, leading to the higher top-1 accuracy during the training process.

## E. More RepViT-SAM Details and Results

### E.1. Implementation Details

Following [30], we distill the image encoder, *i.e.*, RepViT-M2.3, directly from the ViT-H in the original SAM [12], leveraging a simple MSE loss. Like [30], we set the stride of 2 in the last downsampling depthwise convolution to 1 for making the output resolution compatible with that of the image encoder in the original SAM [12]. To speedup the training, we save the image embeddings from the ViT-H beforehand without running the forward process of ViT-H

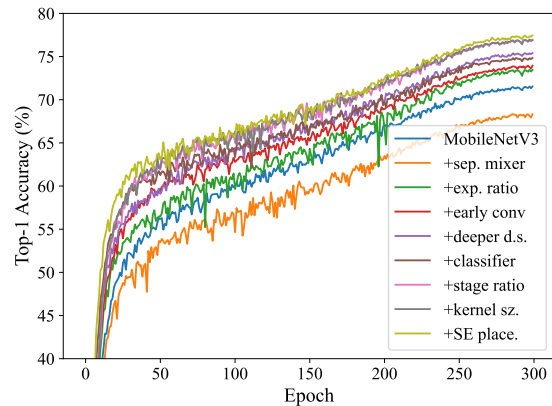

Figure 3. The top-1 accuracy during the training process. Note that these results are obtained without the distillation.

during the distillation, which is the same as [30]. Regarding to zero-shot edge detection on BSDS500 [1, 22], we



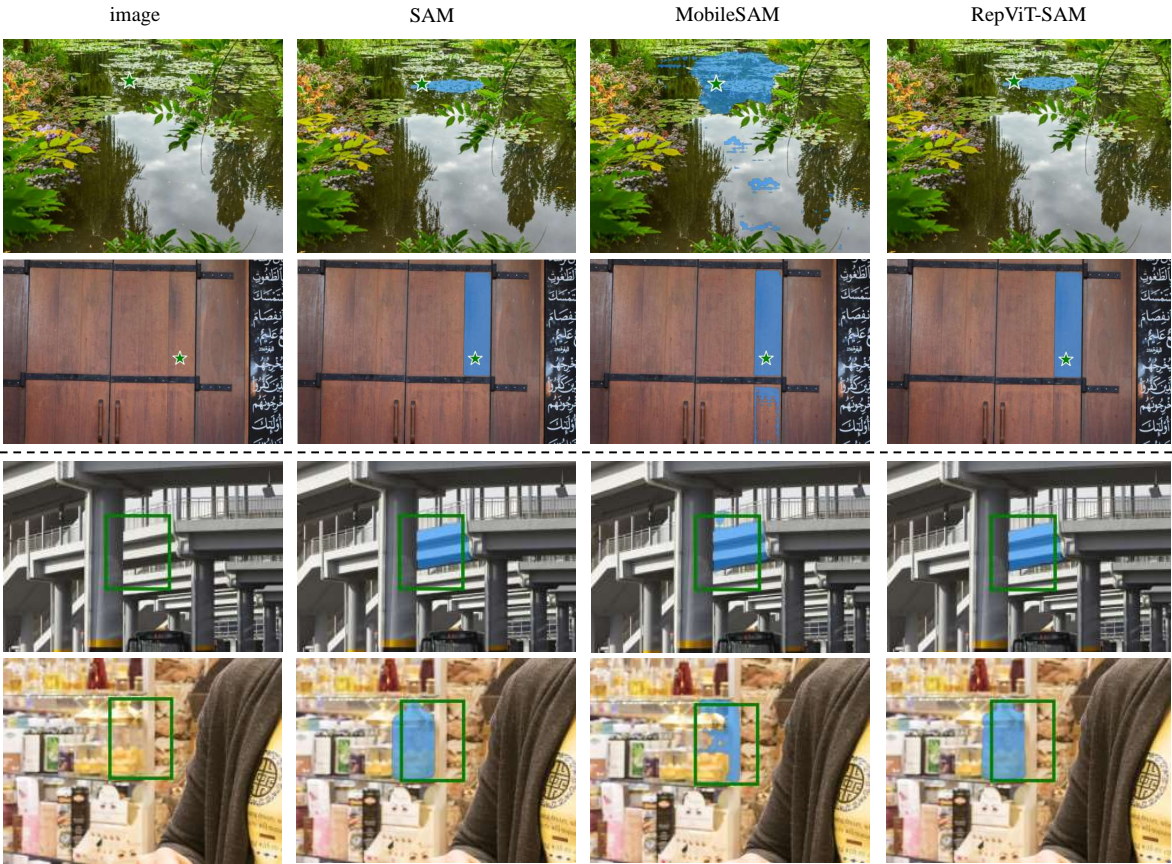

Figure 4. Mask predictions of SAM, MobileSAM, and RepViT-SAM with point prompts (top) and box prompts (bottom).

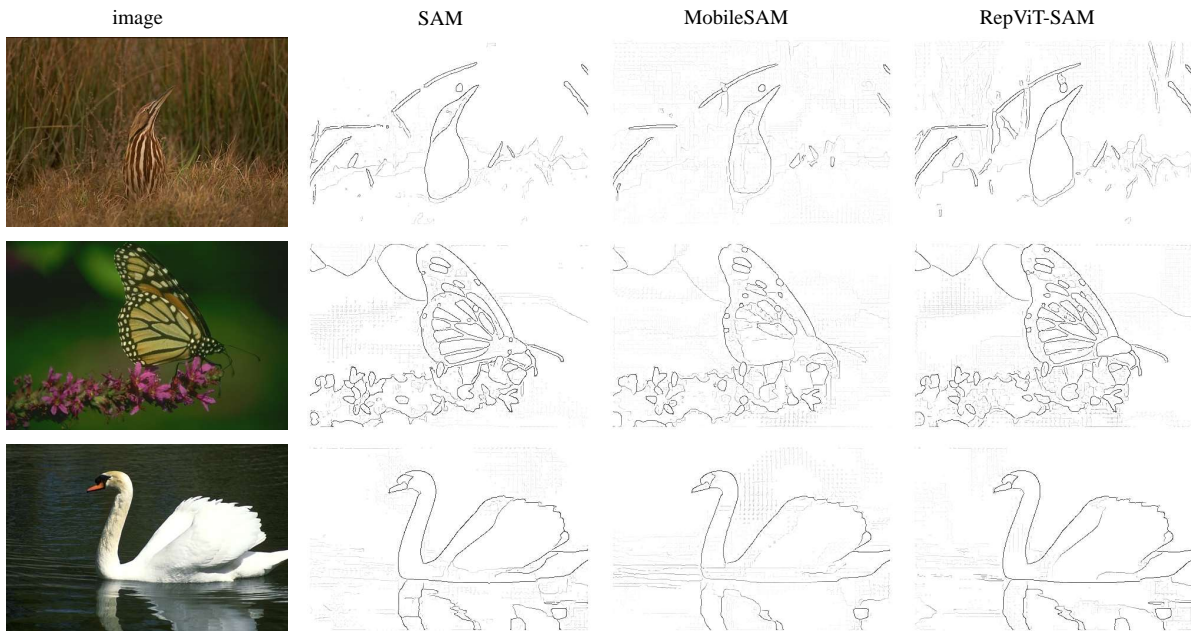

Figure 5. Visualization results of SAM, MobileSAM, and RepViT-SAM for zero-shot edge detection on BSDS500.

follow [12] to prompt the model with a  $16 \times 16$  regular grid of foreground points. NMS is applied to remove redundant masks. Then, we leverage a Sobel filter to the masks' un-threshold probability maps, along with standard lightweight postprocessing, including edge NMS, like [12]. For transferring to zero-shot instance segmentation on COCO [16], we leverage the state-of-the-art H-Deformable-DETR [9] with Swin-L [18] as the object detector and prompt the model with its output boxes, like [10, 12]. For the segmentation in the wild benchmark, we follow [10] to equip the Grounding-DINO [17] as box prompts to evaluate the model on the zero-shot track.

## E.2. Visualization of RepViT-SAM

We present the predicted masks of SAM [12], MobileSAM [30] and RepViT-SAM with point and box prompts in Figure 4. It can be observed that our RepViT-SAM can make high-quality mask predictions similar to that of SAM in various scenarios where MobileSAM may fail to predict accurate masks. Additionally, we provide qualitative comparison results on zero-shot edge detection in Figure 5. RepViT-SAM convincingly produces reasonable edge maps, achieving comparable performance with SAM. In contrast, MobileSAM may struggle to accurately generate edge maps in regions containing intricate details.

## References

- [1] Pablo Arbelaez, Michael Maire, Charless Fowlkes, and Jitendra Malik. Contour detection and hierarchical image segmentation. *IEEE transactions on pattern analysis and machine intelligence*, 33(5):898–916, 2010. 3
- [2] Ekin D Cubuk, Barret Zoph, Dandelion Mane, Vijay Vasudevan, and Quoc V Le. Autoaugment: Learning augmentation strategies from data. In *Proceedings of the IEEE/CVF conference on computer vision and pattern recognition*, pages 113–123, 2019. 1
- [3] Jia Deng, Wei Dong, Richard Socher, Li-Jia Li, Kai Li, and Li Fei-Fei. Imagenet: A large-scale hierarchical image database. In *2009 IEEE conference on computer vision and pattern recognition*, pages 248–255. Ieee, 2009. 1
- [4] Kaiming He, Xiangyu Zhang, Shaoqing Ren, and Jian Sun. Deep residual learning for image recognition. In *Proceedings of the IEEE conference on computer vision and pattern recognition*, pages 770–778, 2016. 2
- [5] Kaiming He, Georgia Gkioxari, Piotr Dollár, and Ross Girshick. Mask r-cnn. In *Proceedings of the IEEE international conference on computer vision*, pages 2961–2969, 2017. 2
- [6] Dan Hendrycks and Thomas Dietterich. Benchmarking neural network robustness to common corruptions and perturbations. *arXiv preprint arXiv:1903.12261*, 2019. 2
- [7] Dan Hendrycks, Steven Basart, Norman Mu, Saurav Kadavath, Frank Wang, Evan Dorundo, Rahul Desai, Tyler Zhu, Samyak Parajuli, Mike Guo, et al. The many faces of robustness: A critical analysis of out-of-distribution generalization. In *Proceedings of the IEEE/CVF International Conference on Computer Vision*, pages 8340–8349, 2021. 2
- [8] Dan Hendrycks, Kevin Zhao, Steven Basart, Jacob Steinhardt, and Dawn Song. Natural adversarial examples. In *Proceedings of the IEEE/CVF Conference on Computer Vision and Pattern Recognition*, pages 15262–15271, 2021. 2
- [9] Ding Jia, Yuhui Yuan, Haodi He, Xiaopei Wu, Haojun Yu, Weihong Lin, Lei Sun, Chao Zhang, and Han Hu. Detsr with hybrid matching. In *Proceedings of the IEEE/CVF Conference on Computer Vision and Pattern Recognition*, pages 19702–19712, 2023. 5
- [10] Lei Ke, Mingqiao Ye, Martin Danelljan, Yifan Liu, Yu-Wing Tai, Chi-Keung Tang, and Fisher Yu. Segment anything in high quality. *arXiv preprint arXiv:2306.01567*, 2023. 5
- [11] Alexander Kirillov, Ross Girshick, Kaiming He, and Piotr Dollár. Panoptic feature pyramid networks. In *Proceedings of the IEEE/CVF conference on computer vision and pattern recognition*, pages 6399–6408, 2019. 2
- [12] Alexander Kirillov, Eric Mintun, Nikhila Ravi, Hanzi Mao, Chloe Rolland, Laura Gustafson, Tete Xiao, Spencer Whitehead, Alexander C Berg, Wan-Yen Lo, et al. Segment anything. *arXiv preprint arXiv:2304.02643*, 2023. 3, 5
- [13] Yanyu Li, Ju Hu, Yang Wen, Georgios Evangelidis, Kamyar Salahi, Yanzhi Wang, Sergey Tulyakov, and Jian Ren. Re-thinking vision transformers for mobilenet size and speed. *arXiv preprint arXiv:2212.08059*, 2022. 1, 2
- [14] Yanyu Li, Geng Yuan, Yang Wen, Ju Hu, Georgios Evangelidis, Sergey Tulyakov, Yanzhi Wang, and Jian Ren. Efficientformer: Vision transformers at mobilenet speed. *Advances in Neural Information Processing Systems*, 35:12934–12949, 2022. 1
- [15] Tsung-Yi Lin, Michael Maire, Serge Belongie, James Hays, Pietro Perona, Deva Ramanan, Piotr Dollár, and C Lawrence Zitnick. Microsoft coco: Common objects in context. In *Computer Vision–ECCV 2014: 13th European Conference, Zurich, Switzerland, September 6–12, 2014, Proceedings, Part V 13*, pages 740–755. Springer, 2014. 3
- [16] Tsung-Yi Lin, Michael Maire, Serge Belongie, James Hays, Pietro Perona, Deva Ramanan, Piotr Dollár, and C Lawrence Zitnick. Microsoft coco: Common objects in context. In *Computer Vision–ECCV 2014: 13th European Conference, Zurich, Switzerland, September 6–12, 2014, Proceedings, Part V 13*, pages 740–755. Springer, 2014. 5
- [17] Shilong Liu, Zhaoyang Zeng, Tianhe Ren, Feng Li, Hao Zhang, Jie Yang, Chunyuan Li, Jianwei Yang, Hang Su, Jun Zhu, et al. Grounding dino: Marrying dino with grounded pre-training for open-set object detection. *arXiv preprint arXiv:2303.05499*, 2023. 5
- [18] Ze Liu, Yutong Lin, Yue Cao, Han Hu, Yixuan Wei, Zheng Zhang, Stephen Lin, and Baining Guo. Swin transformer: Hierarchical vision transformer using shifted windows. In *Proceedings of the IEEE/CVF international conference on computer vision*, pages 10012–10022, 2021. 5
- [19] Zhuang Liu, Hanzi Mao, Chao-Yuan Wu, Christoph Feichtenhofer, Trevor Darrell, and Saining Xie. A convnet for the 2020s. In *Proceedings of the IEEE/CVF conference on computer vision and pattern recognition*, pages 11976–11986, 2022. 2

- [20] Ilya Loshchilov and Frank Hutter. Decoupled weight decay regularization. *arXiv preprint arXiv:1711.05101*, 2017. [1](#)
- [21] Xiaofeng Mao, Gege Qi, Yuefeng Chen, Xiaodan Li, Ranjie Duan, Shaokai Ye, Yuan He, and Hui Xue. Towards robust vision transformer. In *Proceedings of the IEEE/CVF conference on Computer Vision and Pattern Recognition*, pages 12042–12051, 2022. [1](#), [2](#)
- [22] David Martin, Charless Fowlkes, Doron Tal, and Jitendra Malik. A database of human segmented natural images and its application to evaluating segmentation algorithms and measuring ecological statistics. In *Proceedings Eighth IEEE International Conference on Computer Vision. ICCV 2001*, pages 416–423. IEEE, 2001. [3](#)
- [23] Mustafa Munir, William Avery, and Radu Marculescu. Mobilevig: Graph-based sparse attention for mobile vision applications. In *Proceedings of the IEEE/CVF Conference on Computer Vision and Pattern Recognition*, pages 2210–2218, 2023. [1](#)
- [24] Abdelrahman Shaker, Muhammad Maaz, Hanoona Rasheed, Salman Khan, Ming-Hsuan Yang, and Fahad Shahbaz Khan. Swiftformer: Efficient additive attention for transformer-based real-time mobile vision applications. *arXiv preprint arXiv:2303.15446*, 2023. [1](#)
- [25] Pavan Kumar Anasosalu Vasu, James Gabriel, Jeff Zhu, Oncel Tuzel, and Anurag Ranjan. Fastvit: A fast hybrid vision transformer using structural reparameterization. *arXiv preprint arXiv:2303.14189*, 2023. [1](#), [2](#)
- [26] Di Wang, Jing Zhang, Bo Du, Gui-Song Xia, and Dacheng Tao. An empirical study of remote sensing pretraining. *IEEE Transactions on Geoscience and Remote Sensing*, 2022. [2](#)
- [27] Haohan Wang, Songwei Ge, Zachary Lipton, and Eric P Xing. Learning robust global representations by penalizing local predictive power. *Advances in Neural Information Processing Systems*, 32, 2019. [2](#)
- [28] Syed Waqas Zamir, Aditya Arora, Akshita Gupta, Salman Khan, Guolei Sun, Fahad Shahbaz Khan, Fan Zhu, Ling Shao, Gui-Song Xia, and Xiang Bai. isaid: A large-scale dataset for instance segmentation in aerial images. In *Proceedings of the IEEE/CVF Conference on Computer Vision and Pattern Recognition Workshops*, pages 28–37, 2019. [2](#)
- [29] Tete Xiao, Yingcheng Liu, Bolei Zhou, Yuning Jiang, and Jian Sun. Unified perceptual parsing for scene understanding. In *Proceedings of the European conference on computer vision (ECCV)*, pages 418–434, 2018. [2](#)
- [30] Chaoning Zhang, Dongshen Han, Yu Qiao, Jung Uk Kim, Sung-Ho Bae, Seungkyu Lee, and Choong Seon Hong. Faster segment anything: Towards lightweight sam for mobile applications. *arXiv preprint arXiv:2306.14289*, 2023. [3](#), [5](#)
- [31] Hongyi Zhang, Moustapha Cisse, Yann N Dauphin, and David Lopez-Paz. mixup: Beyond empirical risk minimization. *arXiv preprint arXiv:1710.09412*, 2017. [1](#)
- [32] Zhun Zhong, Liang Zheng, Guoliang Kang, Shaozi Li, and Yi Yang. Random erasing data augmentation. In *Proceedings of the AAAI conference on artificial intelligence*, pages 13001–13008, 2020. [1](#)
- [33] Bolei Zhou, Hang Zhao, Xavier Puig, Sanja Fidler, Adela Barriuso, and Antonio Torralba. Scene parsing through ade20k dataset. In *Proceedings of the IEEE conference on computer vision and pattern recognition*, pages 633–641, 2017. [1](#), [3](#)
